# Supplementary material for: Dysregulated palmitic acid metabolism promotes the formation of renal calcium-oxalate stones through ferroptosis induced by polyunsaturated fatty acids/phosphatidic acid
Source: Springer Nature journal article supplement (doi:10.1007/s00018-024-05145-y), 2024-02-12
Supplement: MOESM1 [file 18_2024_5145_MOESM1_ESM.pdf]

**Dysregulated palmitic acid metabolism promotes the formation of renal calcium-oxalate stones  
through ferroptosis induced by polyunsaturated fatty acids/phosphatidic acid**

Journal name: Cellular and Molecular Life Sciences

Rui Wang<sup>a b1</sup>, Jingdong Zhang<sup>a1</sup>, Haotian Ren<sup>a</sup>, Shiyong Qi<sup>a</sup>, Linguo Xie<sup>a</sup>, Haijie Xie<sup>a</sup>, Zhiqun Shang<sup>a\*</sup>,  
Chunyu Liu<sup>a\*</sup>

<sup>a</sup>Department of Urology, Tianjin Institute of Urology, The Second Hospital of Tianjin Medical University, Tianjin, China.

<sup>b</sup>Department of Physiology and Pathophysiology, Tianjin Medical University, Tianjin, China.

<sup>1</sup> These authors contributed equally to this article.

\*Corresponding author

Zhiqun Shang, Department of Urology, Tianjin Institute of Urology, The Second Hospital of Tianjin Medical University. E-mail: zhiqun\_shang@tmu.edu.cn.

Chunyu Liu, Department of Urology, Tianjin Institute of Urology, The Second Hospital of Tianjin Medical University. E-mail: prof\_liucy@163.com.

## Supplemental methods and materials

Table S1. Clinical characteristics of both groups of urine samples.

| Characteristic                        | Patients      |             |             | Controls      | <i>p</i> -value |
|---------------------------------------|---------------|-------------|-------------|---------------|-----------------|
|                                       | Total         | New-onset   | Recurrence  |               |                 |
| Samples                               | 137           | 55          | 82          | 103           |                 |
| Age                                   | 53.12 ± 12.20 | 52.63±12.87 | 53.44±11.17 | 51.83 ± 14.25 | 0.998*          |
| Gender <sup>a</sup> ,                 | 95/42         | 40/15       | 55/27       | 61/42         | 0.211           |
| Scr <sup>b</sup> (μM)                 | 84.52 ± 21.09 | 87.05±18.57 | 82.82±22.57 | 82.42 ± 24.70 | 0.095*          |
| BMI <sup>c</sup> (kg/m <sup>2</sup> ) | 26.45 ± 3.77  | 25.75±3.72  | 26.50±3.51  | 25.50 ± 3.20  | 0.241*          |

\*one-way ANOVA or non-parametric test (Kruskal-Wallis); <sup>a</sup>male/female; <sup>b</sup>Serum creatinine;

<sup>c</sup>Body mass index.

Table S2. Clinical characteristics of both groups of serum samples.

| Characteristic                        | Patients      |             |             | Controls      | <i>p</i> -value |
|---------------------------------------|---------------|-------------|-------------|---------------|-----------------|
|                                       | Total         | New-onset   | Recurrence  |               |                 |
| Samples                               | 65            | 33          | 32          | 20            |                 |
| Age                                   | 55.63 ± 10.44 | 55.59±10.68 | 55.67±10.22 | 53.94 ± 11.05 | 0.653*          |
| Gender <sup>a</sup> ,                 | 40/25         | 18/14       | 22/11       | 16/4          | 0.212           |
| Cre <sup>b</sup> (μM)                 | 82.36 ± 18.33 | 80.39±20.97 | 84.28±15.43 | 82.40 ± 21.78 | 0.719*          |
| BMI <sup>c</sup> (kg/m <sup>2</sup> ) | 26.77 ± 3.58  | 26.90±3.56  | 26.68±3.65  | 25.96 ± 2.42  | 0.610*          |

\* one-way ANOVA; <sup>a</sup>male/female; <sup>b</sup>Serum creatinine; <sup>c</sup>Body mass index.

Table S3. All the antibodies were used in the study.

| Antibody      | Brand and Cat. NO. | Dilution in IHC | Dilution in IF | Dilution in WB |
|---------------|--------------------|-----------------|----------------|----------------|
| ELOVL2        | Abcam 176327       | 1:200           |                | 1:6000         |
| ELOVL5        | Abcam 205535       | 1:200           |                | 1:2000         |
| ACSL1         | Abcam 177958       | 1:200           |                | 1:6000         |
| FADS1         | Abcam 126706       | 1:200           |                | 1:6000         |
| FADS2         | SAB 27350          | 1:200           |                | 1:2000         |
| FTH1          | Abcam 183781       | 1:200           |                | 1:2000         |
| GPX4          | Affinity DF6701    | 1:150           |                | 1:1500         |
| ACSL4         | Affinity DF12141   | 1:150           |                | 1:1500         |
| 4-HNE         | Abcam 46545        | 1:100           |                |                |
| TFRC          | Abcam 214039       | 1:200           |                | 1:2000         |
| SCD1          | Abcam 236868       | 1:200           |                | 1:2000         |
| DGAT1         | Abcam 181180       | 1:200           |                | 1:6000         |
| CD44          | Abcam 189524       | 1:100           |                | 1:2000         |
| KIM-1         | Bioss 2713R        | 1:150           |                | 1:1000         |
| OPN           | Huabio 0806-6      | 1:150           |                | 1:1500         |
| SLC7A11       | Abcam 175186       | 1:200           |                | 1:2000         |
| SLC3A2        | Affinity DF7468    | 1:150           |                | 1:1500         |
| PKC $\zeta$   | Santacruz 17781    | 1:100           |                | 1:8000         |
| p-PKC $\zeta$ | Santacruz 271962   | 1:100           |                | 1:1000         |
| PEBP1         | Santacruz 101504   | 1:100           | 1:100          | 1:1000         |

---

|               |                  |       |       |        |
|---------------|------------------|-------|-------|--------|
| p-PEBP1       | Santacruz 135779 | 1:100 |       | 1:1000 |
| 15-LO(mouse)  | Santacruz 133085 | 1:100 |       | 1:1000 |
| 15-LO(rabbit) | SAB 37409        | 1:200 | 1:100 |        |
| GPAT1         | Abcam 69990      | 1:200 |       | 1:6000 |

---

Table S4. The primer sequences were used for qPCR.

| Gene    |         | Sequences               |
|---------|---------|-------------------------|
| GAPDH   | Forward | ATCATCCCTGCCTCTACTGG    |
|         | Reverse | GTCAGGTCCACCACTGACAC    |
| FADS1   | Forward | GGCCCAGGAAGGCTTTCA      |
|         | Reverse | CCAGCCTTGCTGCCTCTCT     |
| FADS2   | Forward | GCACCCTTTAAGTGGCCAAT    |
|         | Reverse | TTGGCAATGGCTGGATTCCT    |
| SLC3A2  | Forward | ACTCTTCTCCTATATCCGCCACT |
|         | Reverse | CCCACATCCCCAAAGTTAAGCAC |
| SLC7A11 | Forward | TCTCCAAAGGAGGTTACCTGC   |
|         | Reverse | AGACTCCCCTCAGTAAAGTGAC  |

Table S5. Information of differential fatty acyls.

| Name                           | Fold change | P value  |
|--------------------------------|-------------|----------|
| Citraconic acid                | 0.21        | 1.27E-34 |
| Arachidic acid                 | 0.48        | 2.57E-11 |
| cis-9-Palmitoleic acid         | 0.80        | 2.33E-06 |
| Heptadecanoic acid             | 0.82        | 1.65E-03 |
| Acetylcarnitine                | 0.73        | 1.76E-03 |
| Jasmonic acid                  | 0.60        | 2.08E-03 |
| 2-Hydroxy-3-methylbutyric acid | 0.85        | 2.04E-02 |
| Stearic acid                   | 0.86        | 2.33E-02 |
| Palmitic acid                  | 1.16        | 2.35E-02 |
| Erucic acid                    | 0.88        | 4.76E-02 |





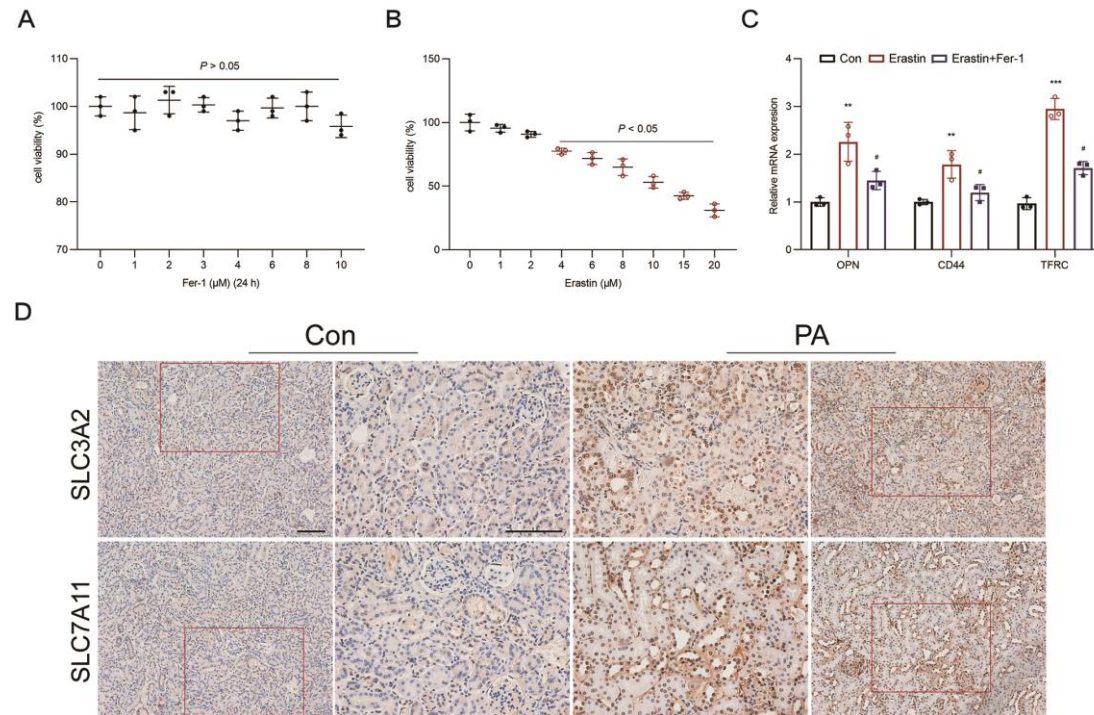

**Fig. S2 PA enhanced PUFA peroxidation to induce ferroptosis of renal tubular epithelial cells.**

**A** MTT assay was performed to screen Fer-1 optimal effect concentration. **B** MTT assay was used to screen erastin effective concentration. **C** The mRNA levels of OPN, CD44, and TFRC in HK-2 cells treated with Erastin were measured by qPCR assay. **D** The protein levels of SLC3A2 and SLC7A11 in renal tubules treated with PA were detected by IHC. \*\* $p < 0.01$ , \*\*\* $p < 0.001$ , compared with the control; # $p < 0.05$ , compared with the PA group. Scale bar, 100 μm.

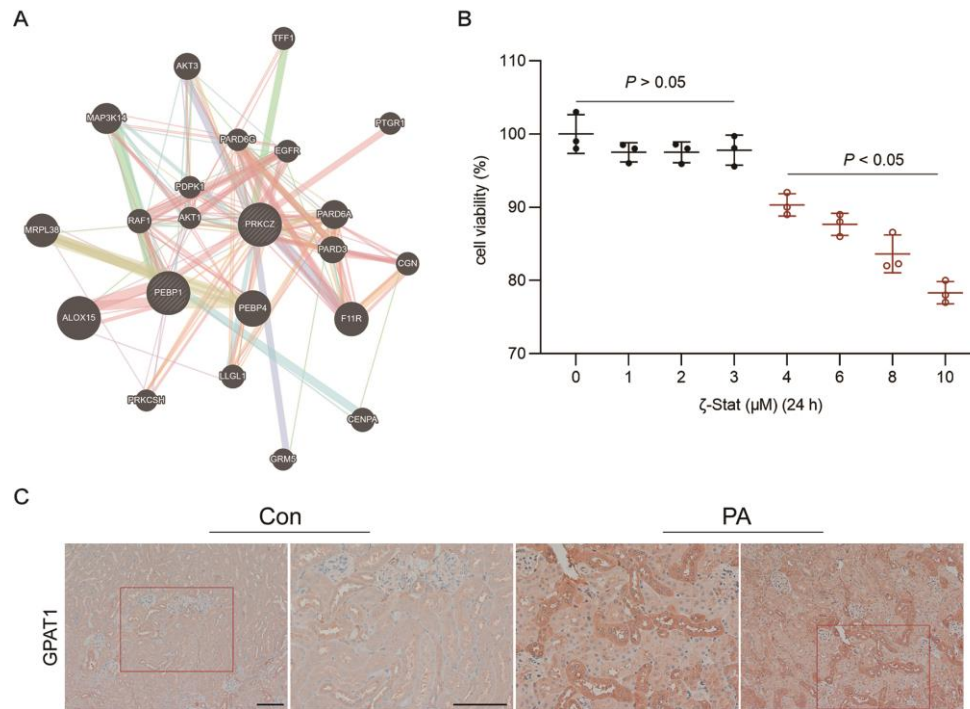

**Fig. S3 Phosphatidic acid derived from PA activated PKC  $\zeta$  to promote the formation of the PEBP1/15-LO complex, and accelerate PUFA peroxidation.**

**A** Protein interaction of PKC  $\zeta$  and PEBP1 was analyzed. **B** MTT assay was performed to screen  $\zeta$ -Stat optimal effect concentration. **C** The expression of SLC3A2 and SLC7A11 was detected by IHC in renal tubules. Scale bar, 100  $\mu$ m.

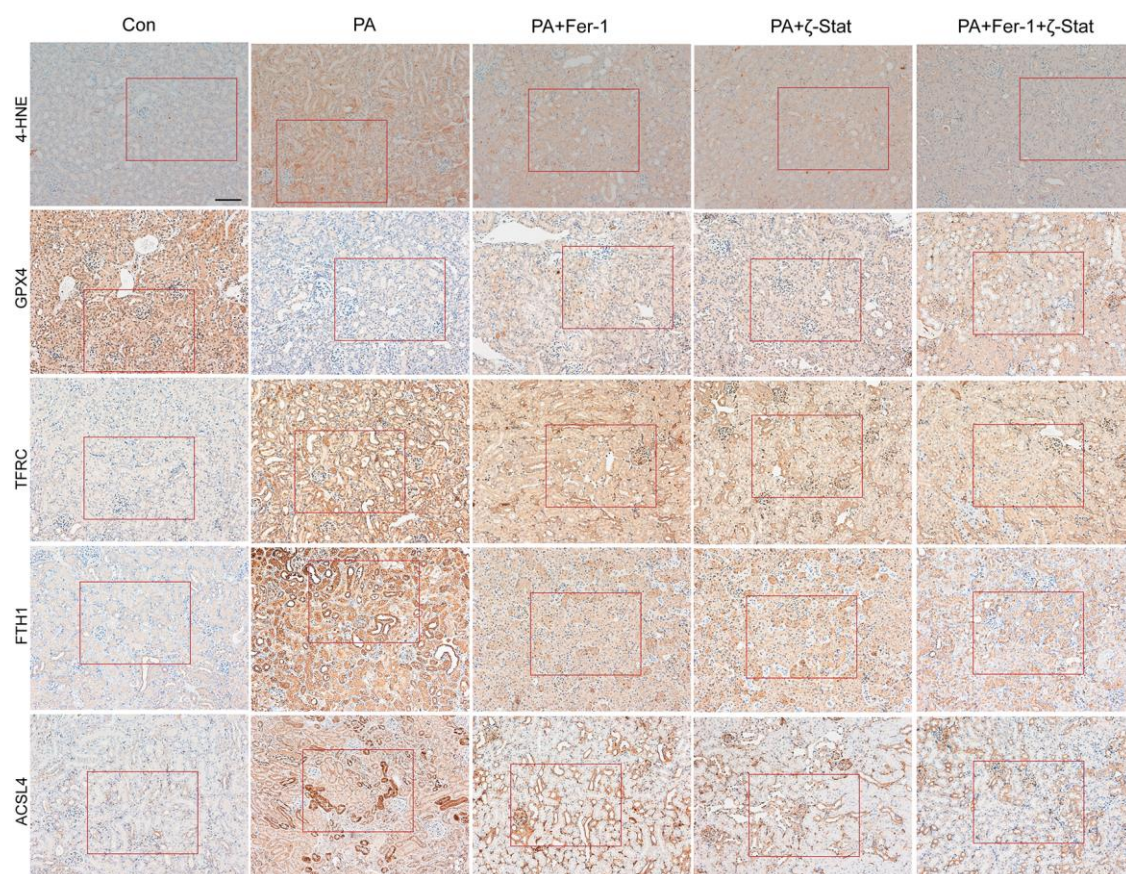

**Fig. S4 PKC  $\zeta$  promoted PEBP1 and 15-LO binding to accelerate the peroxidation of PUFAs.**

The protein levels of 4-HNE, GPX4, TFRC, FTH1, and ACSL4 in renal tubules were evaluated by IHC

(100 $\times$ ). Scale bar, 100  $\mu$ m.



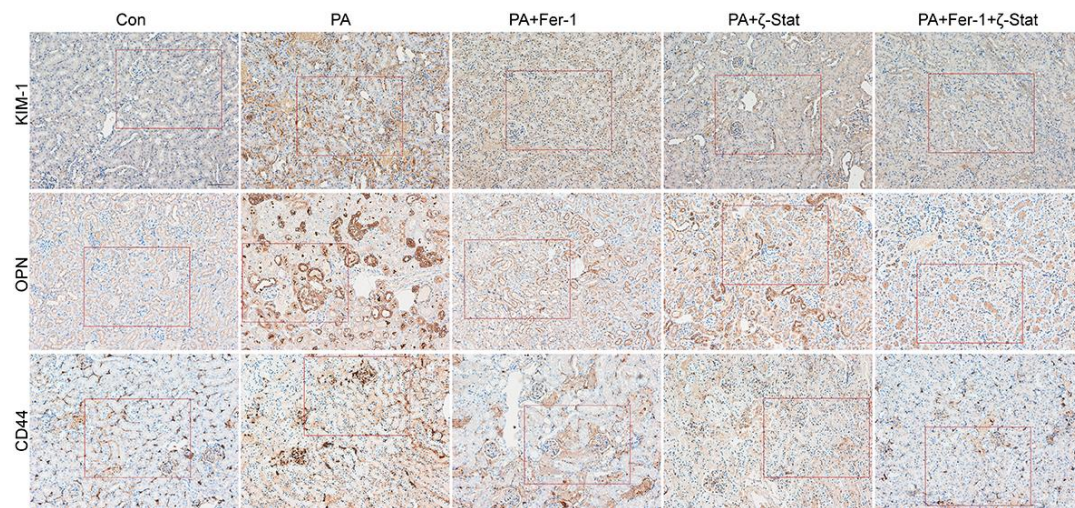

**Fig. S5 Inhibition of PUFA peroxidation reduced renal CaOx crystal deposition.**

The protein levels of KIM-1, OPN, and CD44 in renal tubules were evaluated by IHC (100×). Scale bar,

100 μm.

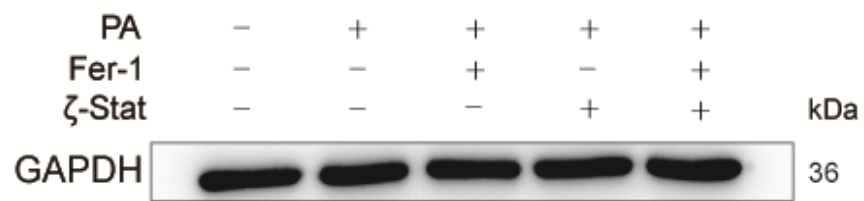

**Fig. S6 . The internal control levels for OPN in Fig 7.**

The protein levels of GAPDH in the five groups.
